# Supplementary material for: Loss of RBMS1 promotes anti-tumor immunity through enabling PD-L1 checkpoint blockade in triple-negative breast cancer
Source: PubMed Central journal article supplement (PMC9613699; doi:10.1038/s41418-022-01012-0), 2022-05-10

Figure.1E  
MDA-MB-231

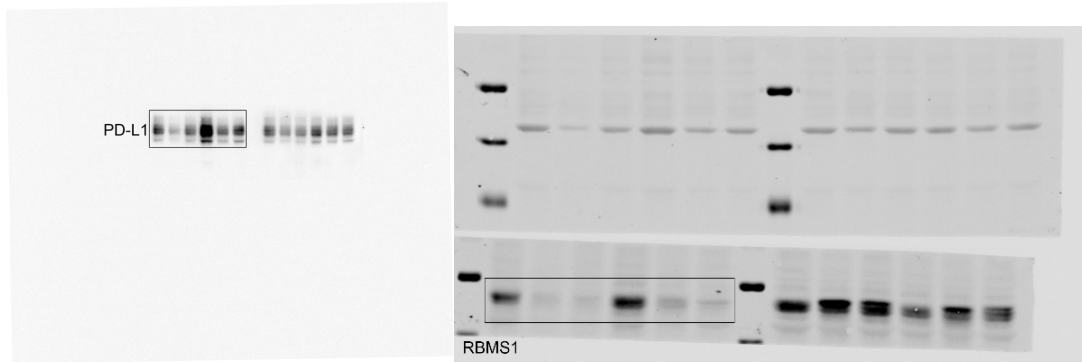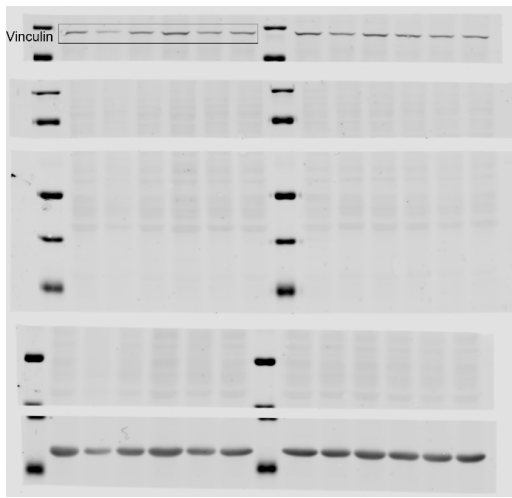

HCC1937

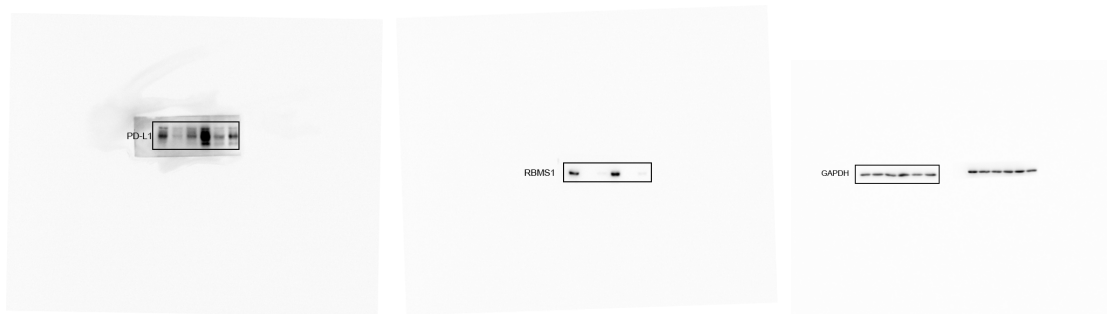

BT-549  
-IFN $\gamma$

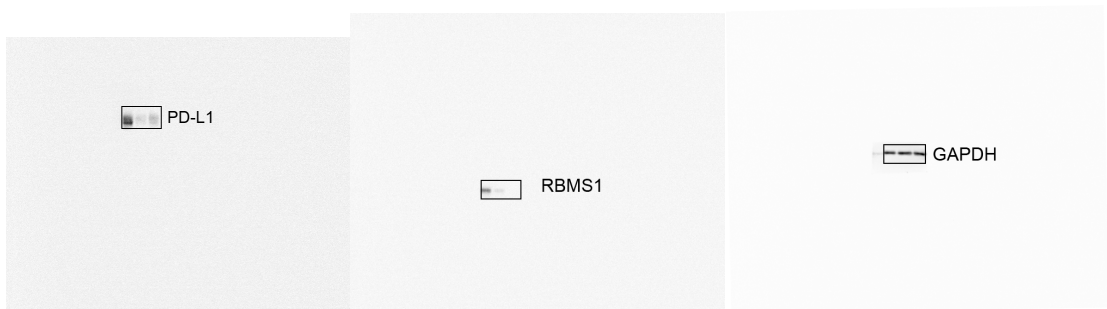

+IFN $\gamma$

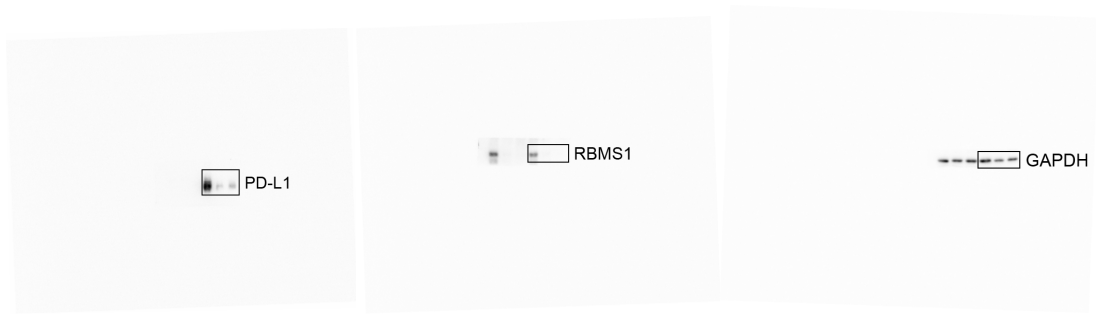

Figure.3B  
MDA-MB-231

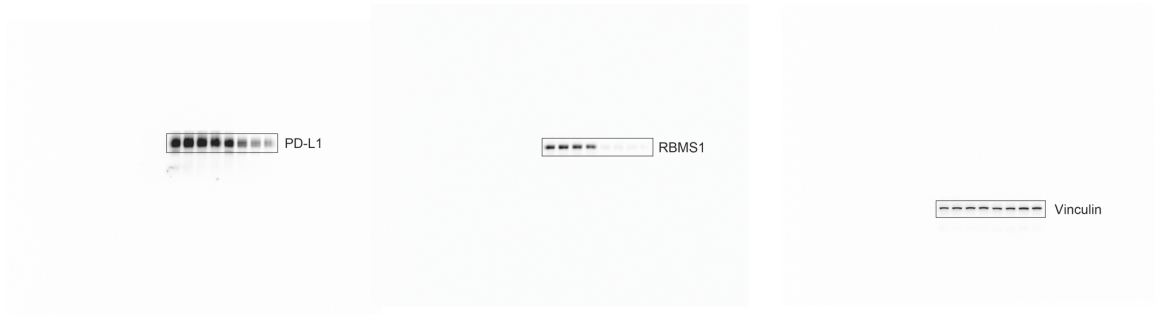

4T1

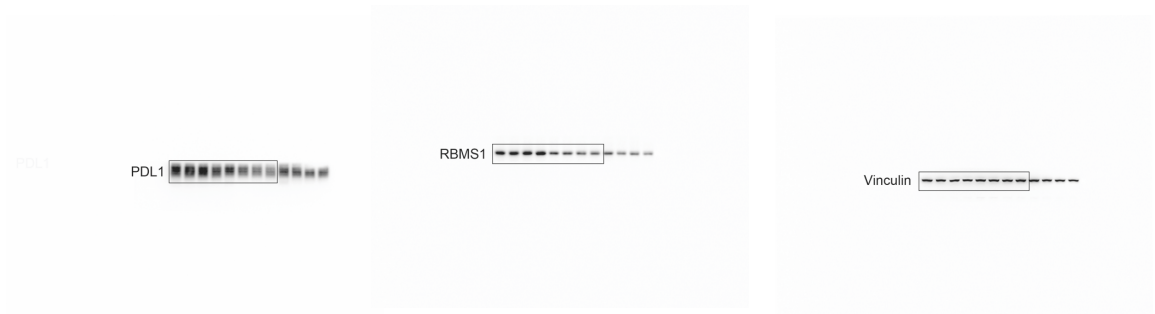

Figure.3C  
MDA-MB-231

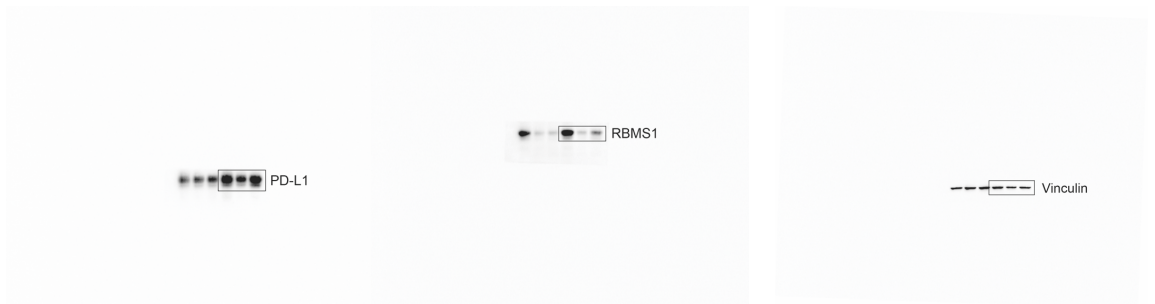

Figure.3D  
HEK-293T

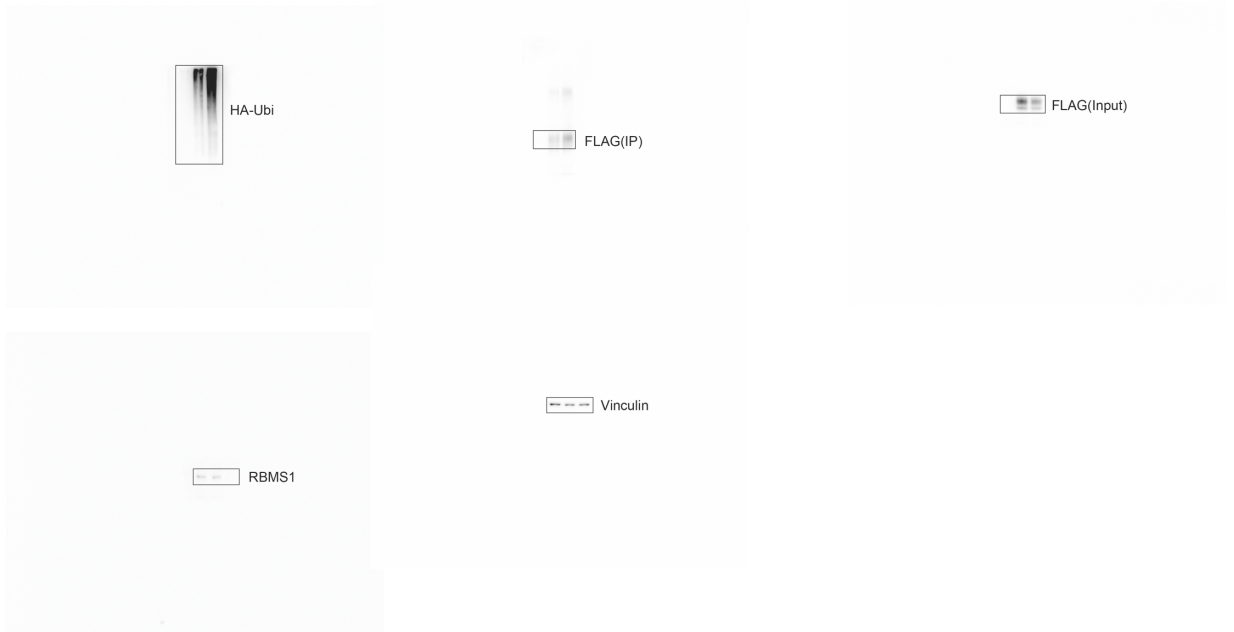

Figure.3E  
MDA-MB-231

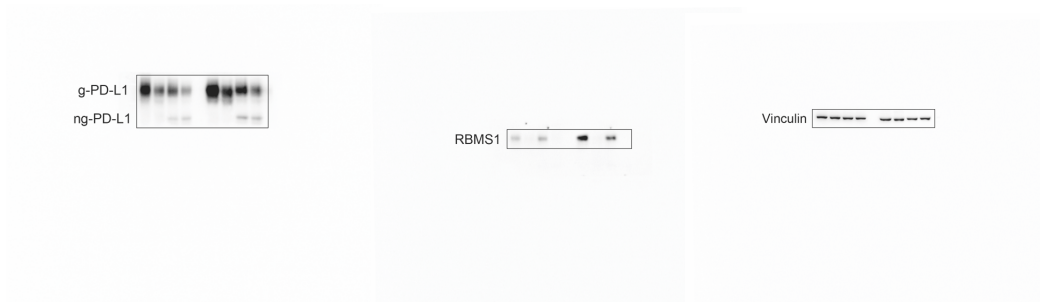

Figure.3F  
MDA-MB-231

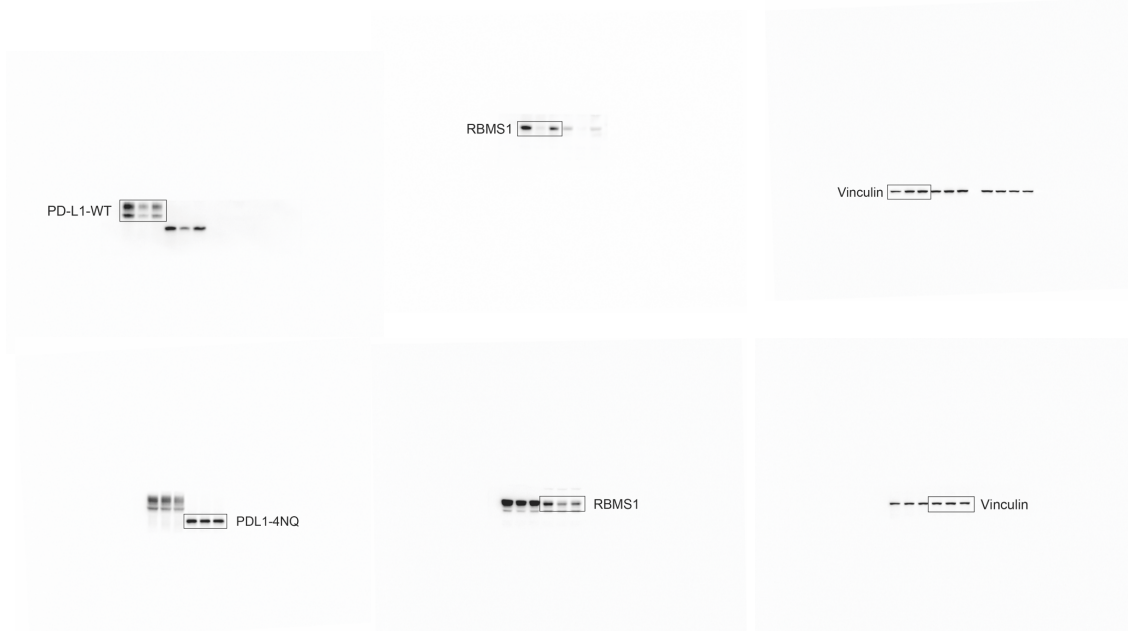

Figure.4B  
MDA-MB-231

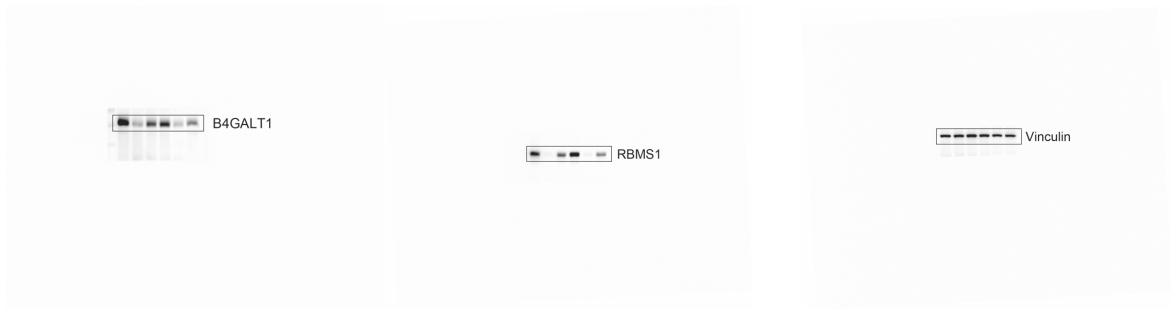

BT-549

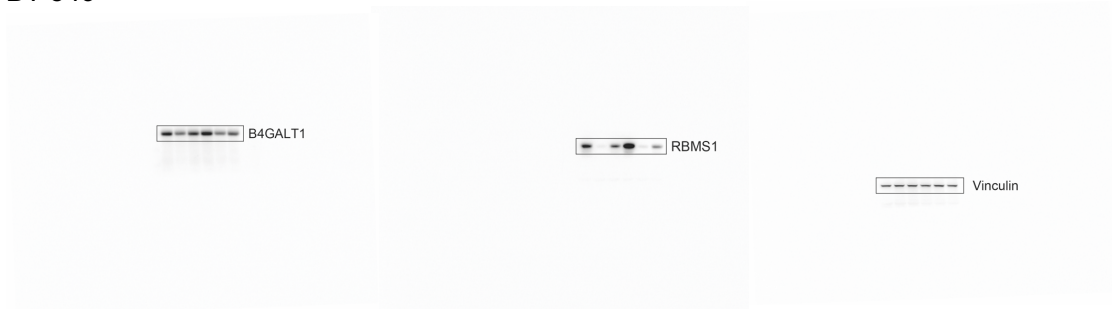

Figure.4D  
MDA-MB-231

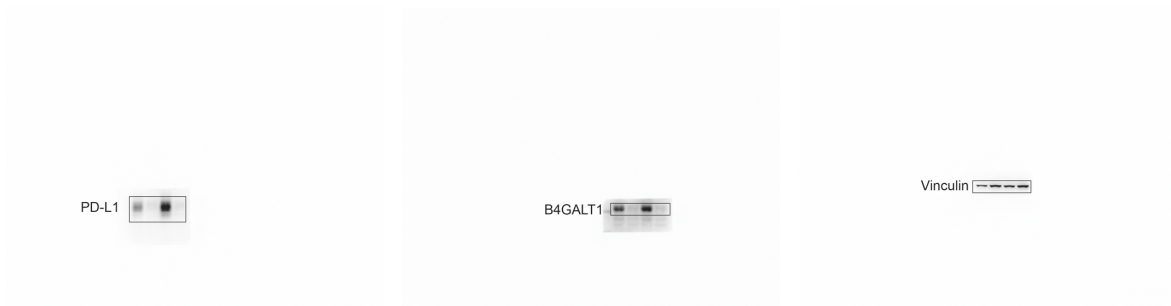

HCC1937

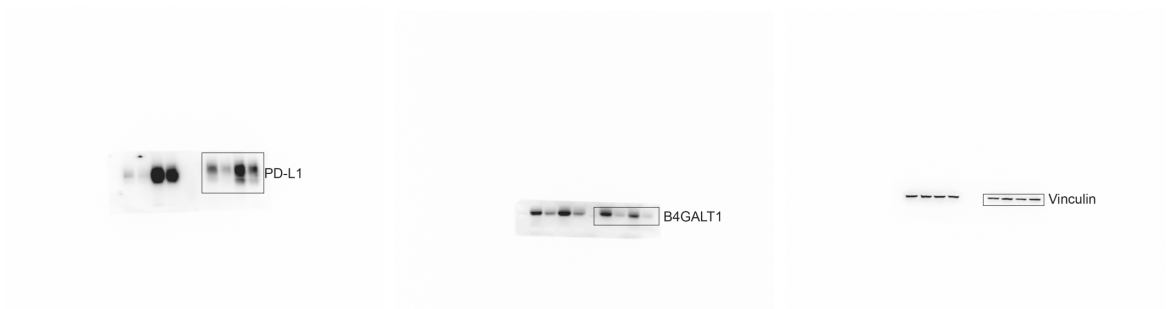



Figure.4E  
MDA-MB-231

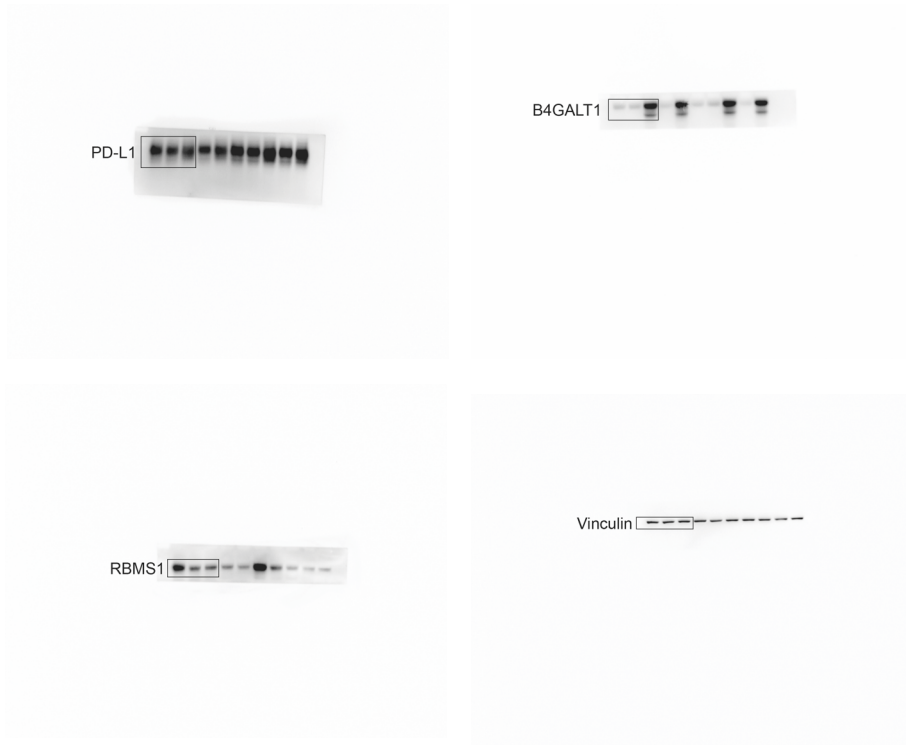

BT-549

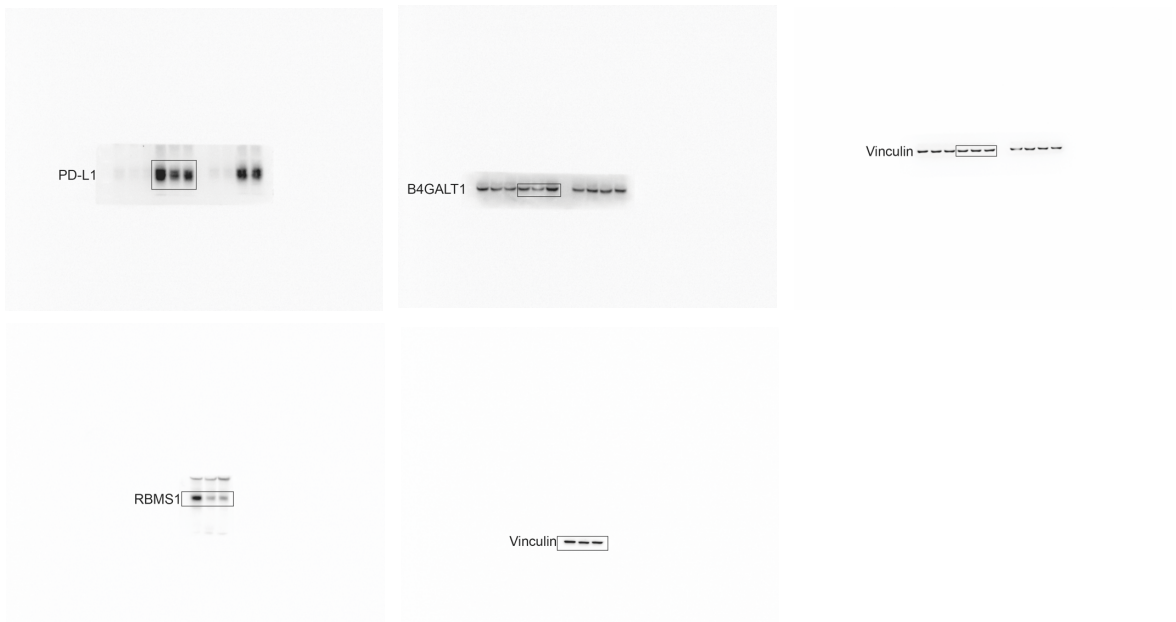

Figure.4F  
MDA-MB-231

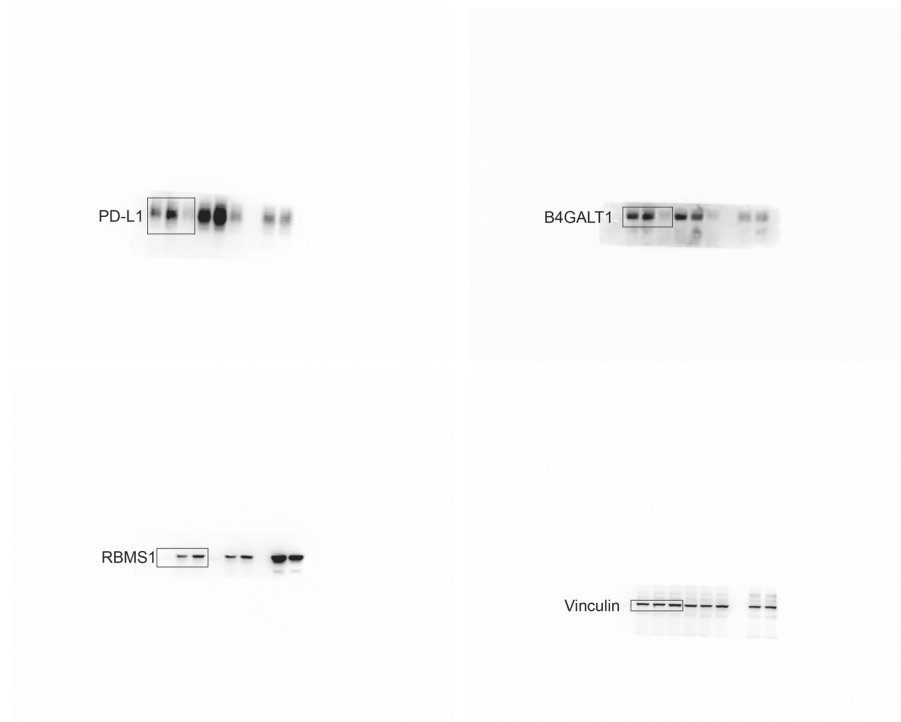

Figure.4G  
HEK-293T

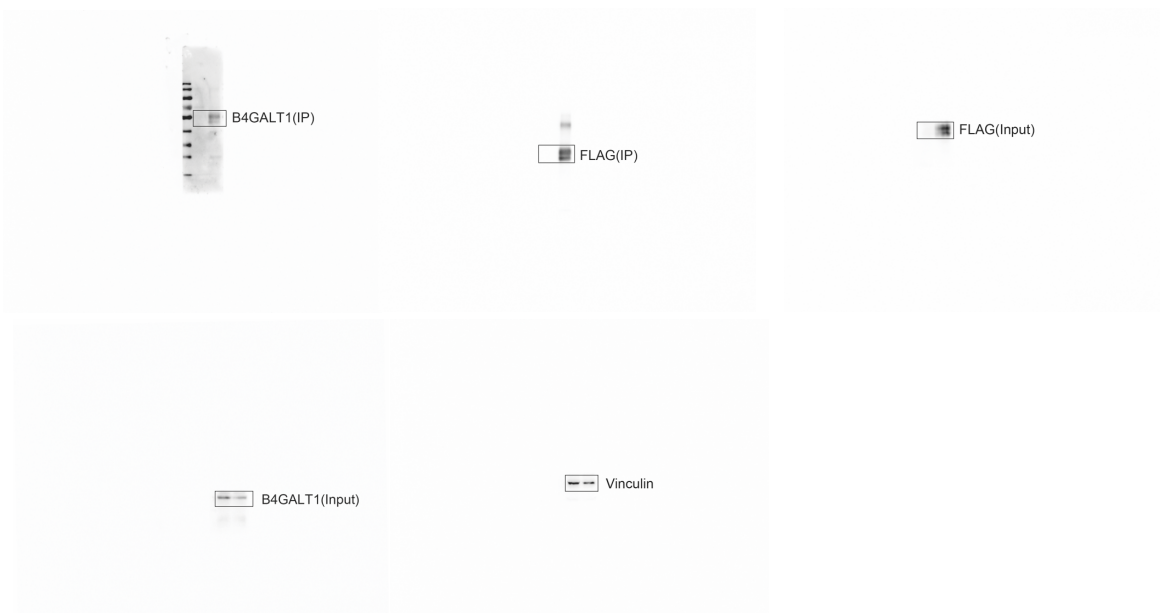

HEK-293T

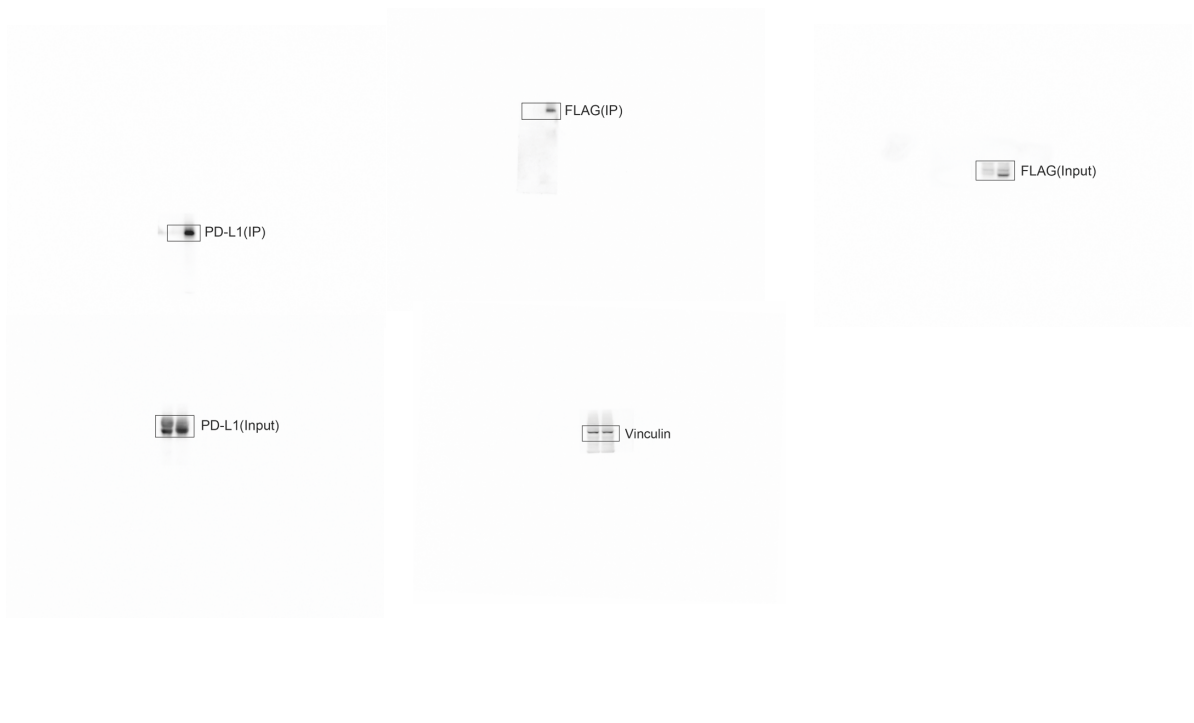

Supplementary Fig.1D

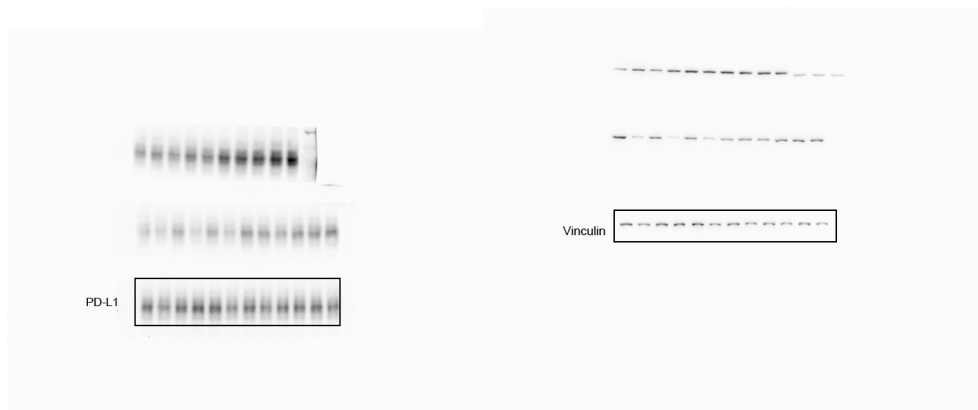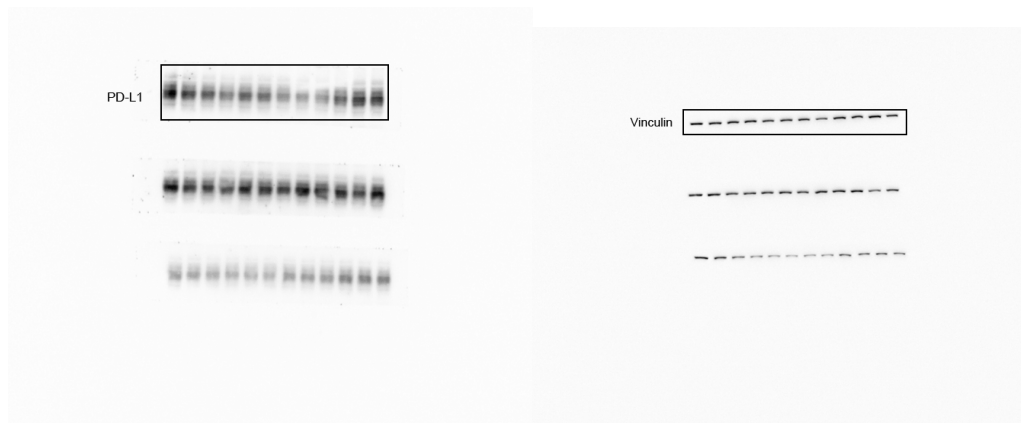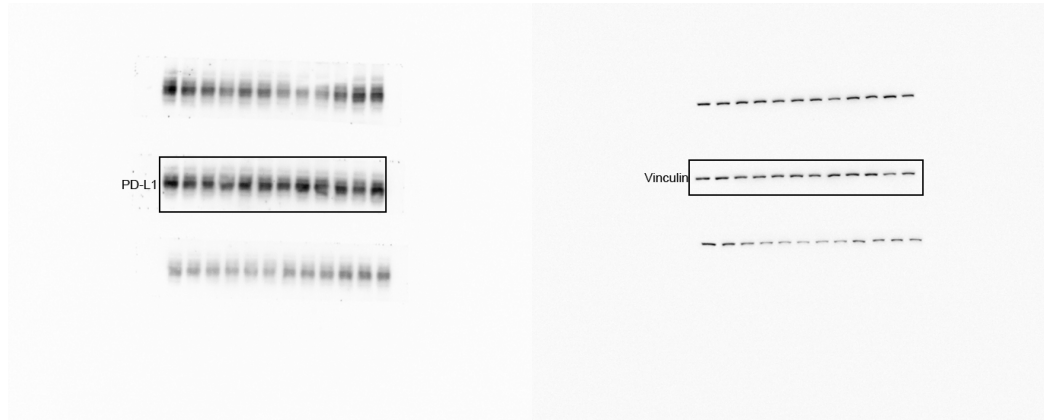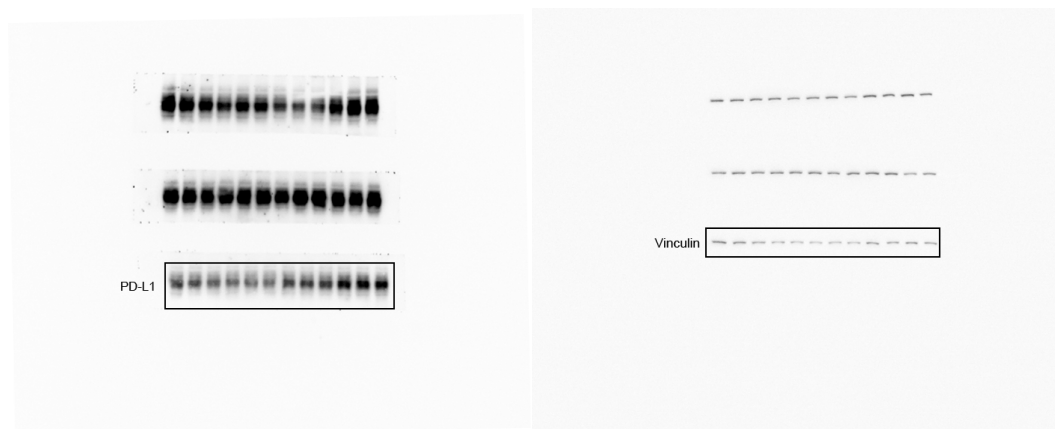

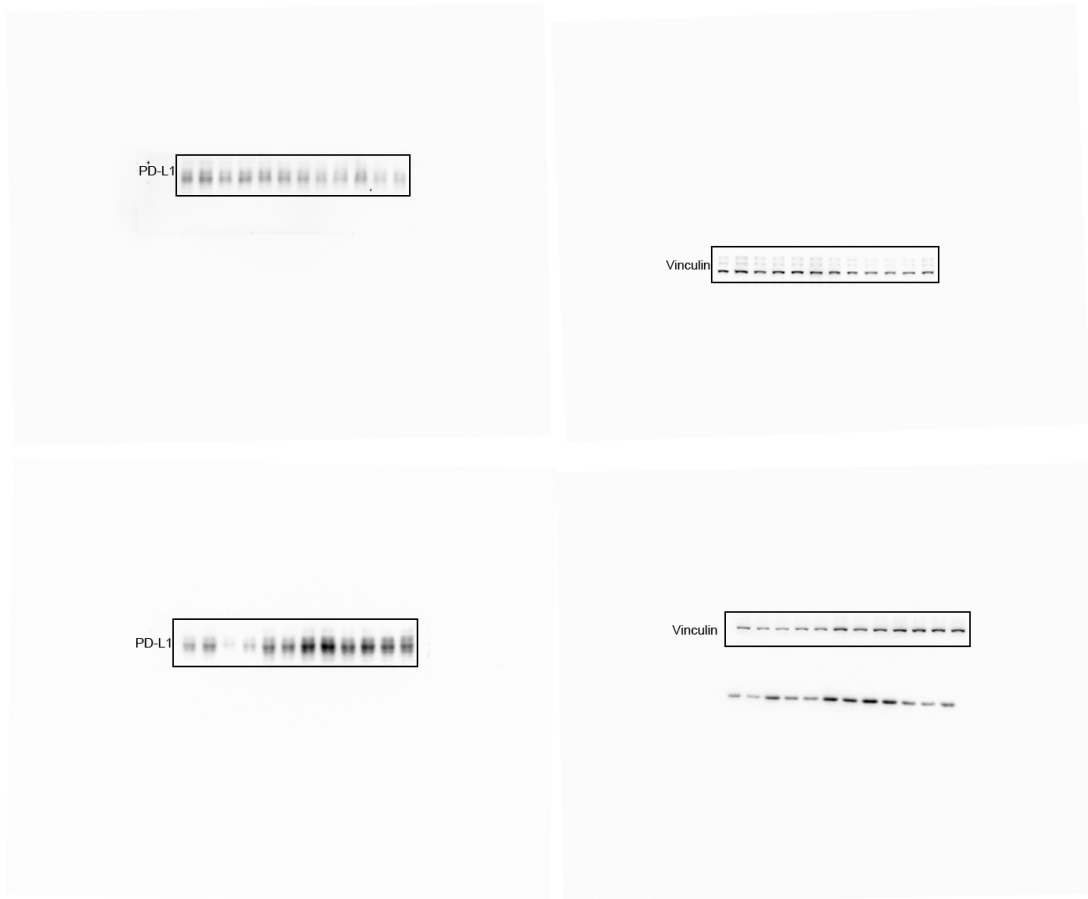

Supplementary Fig.1E

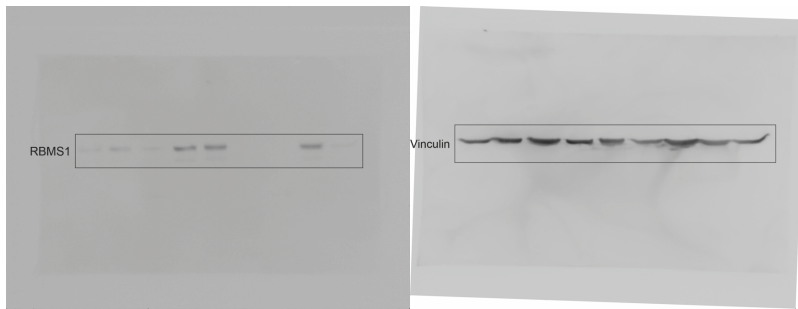

Supplementary Fig.1F

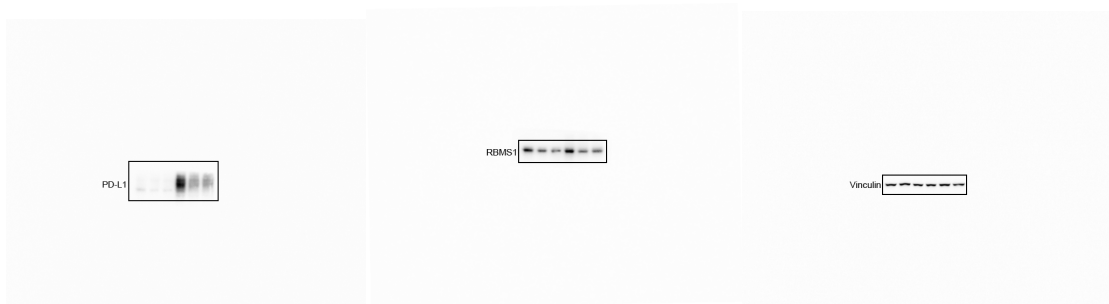



Supplementary Fig.1G  
MDA-MB-231

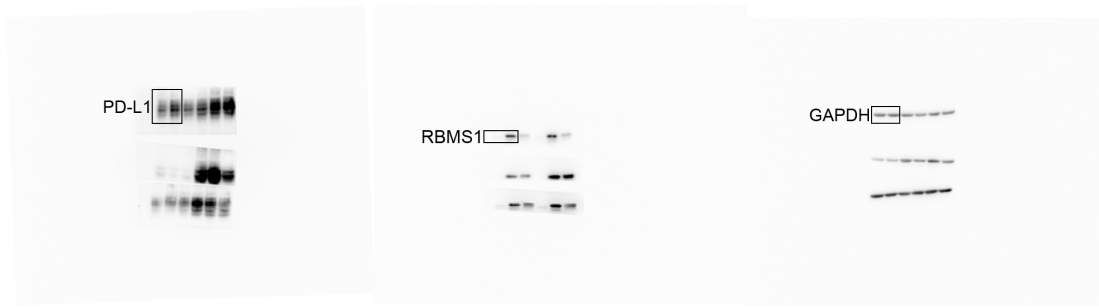

BT-549

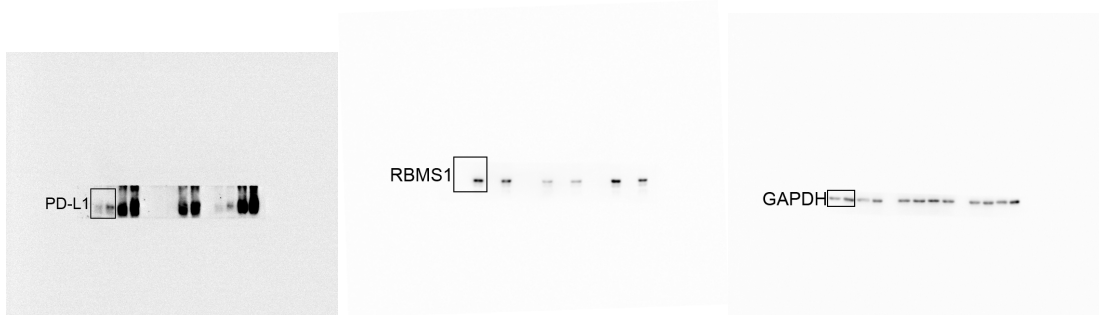

HCC1937

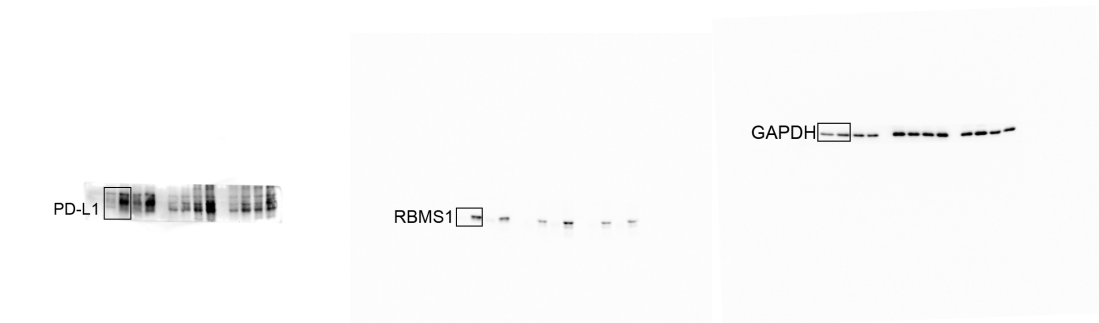

Supplementary Fig.2A

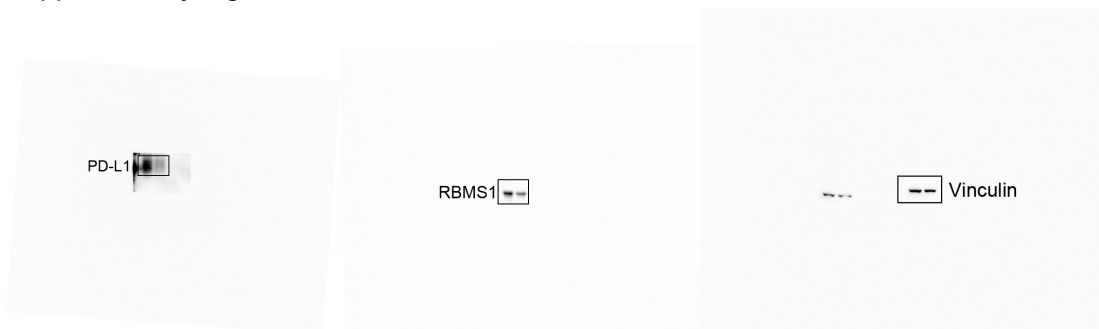

Supplementary Fig.2C  
MDA-MB-231

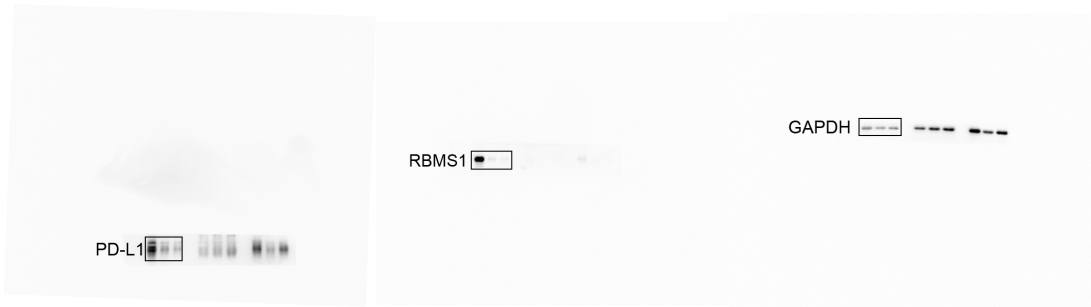

BT-549

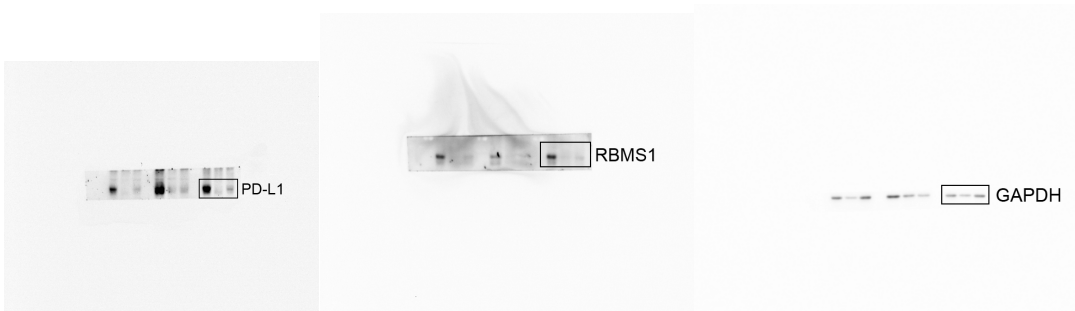

HCC1937

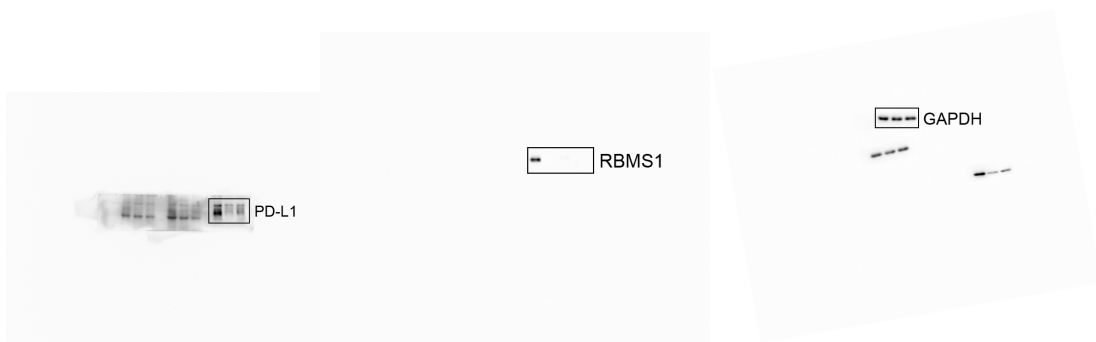

Supplementary Fig.3C  
MDA-MB-231

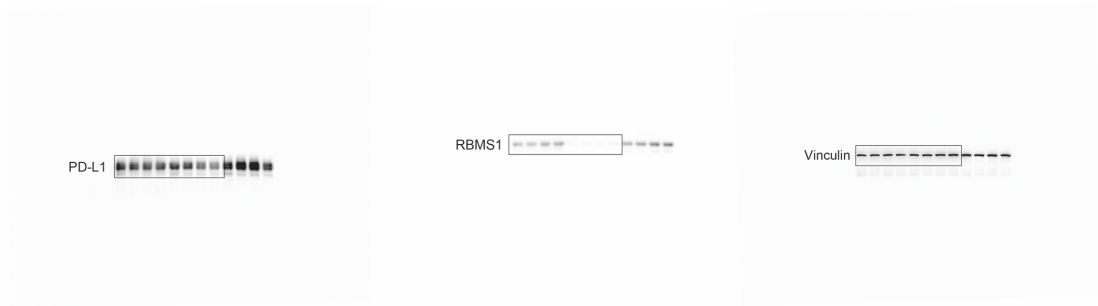

Supplementary Fig.3D  
HEK-293T

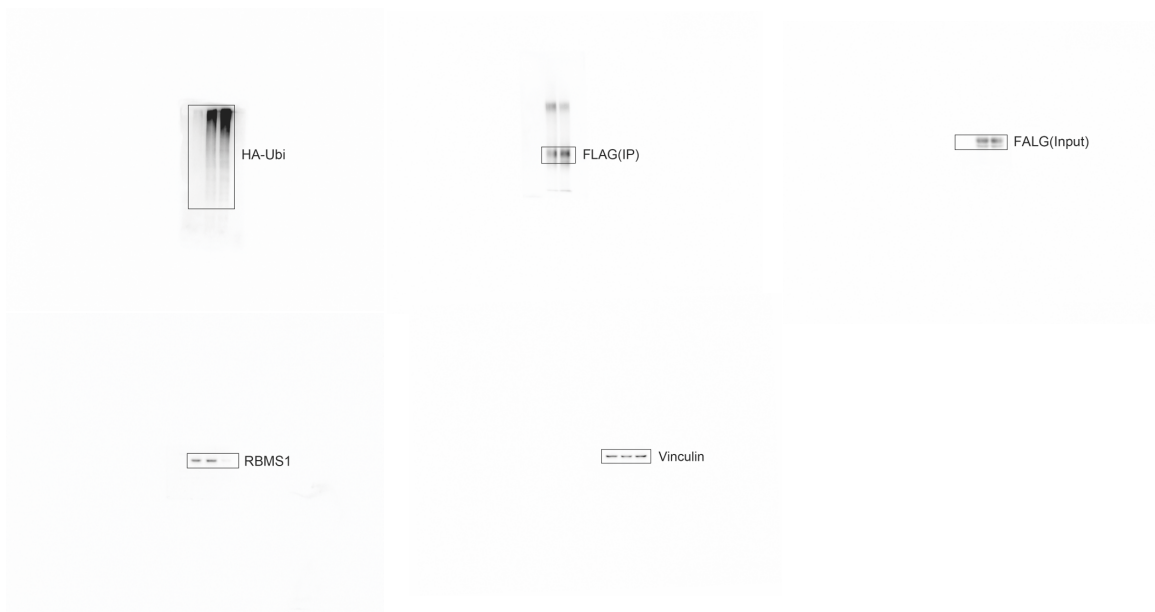

Supplementary Fig.3E  
HEK-293T

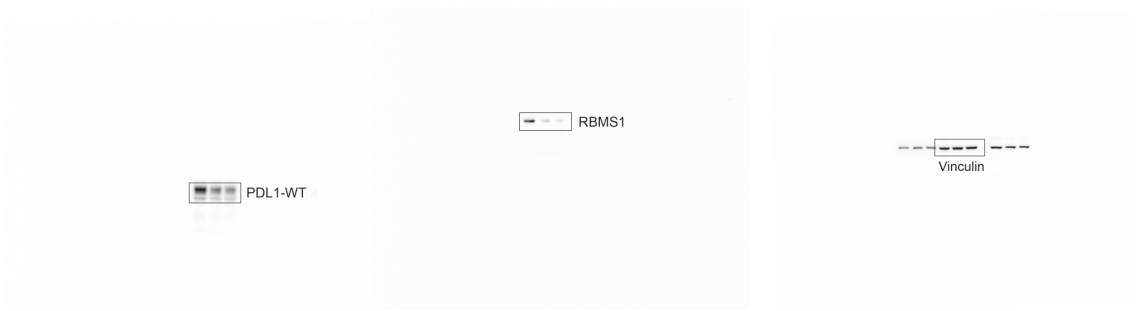

HEK-293T

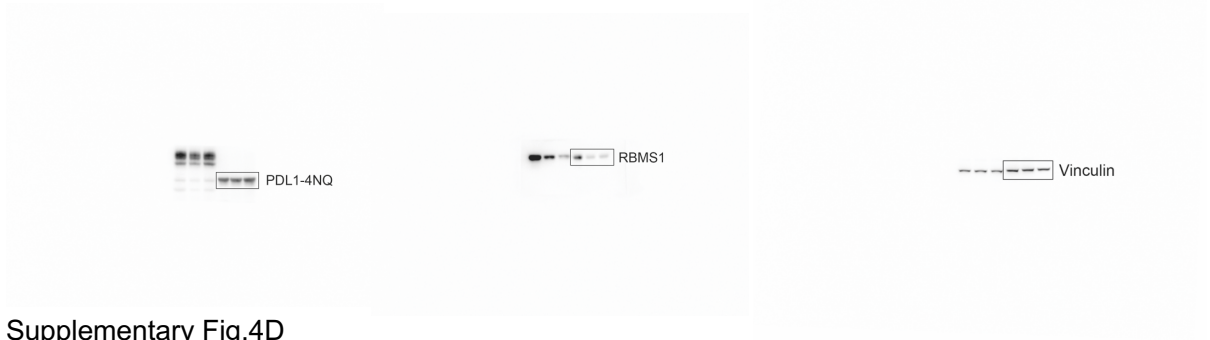

Supplementary Fig.4D

HCC1937

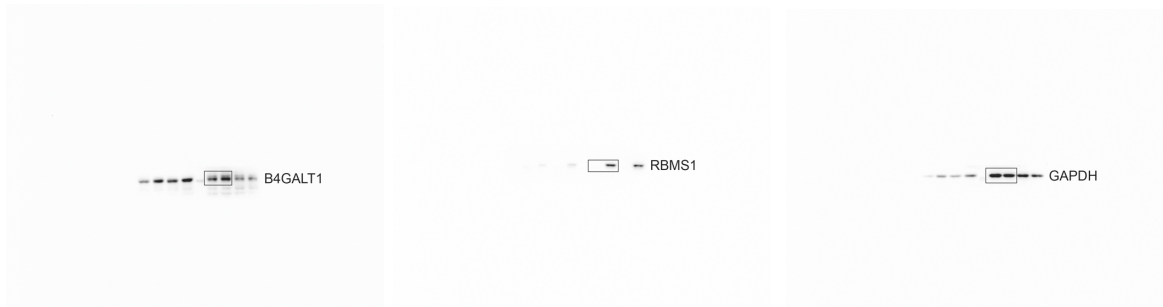

BT-549

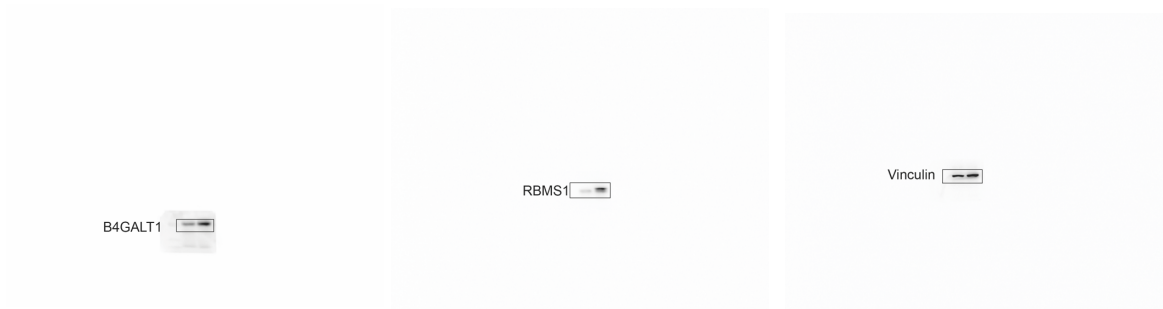

Supplementary Fig.4E

BT-549

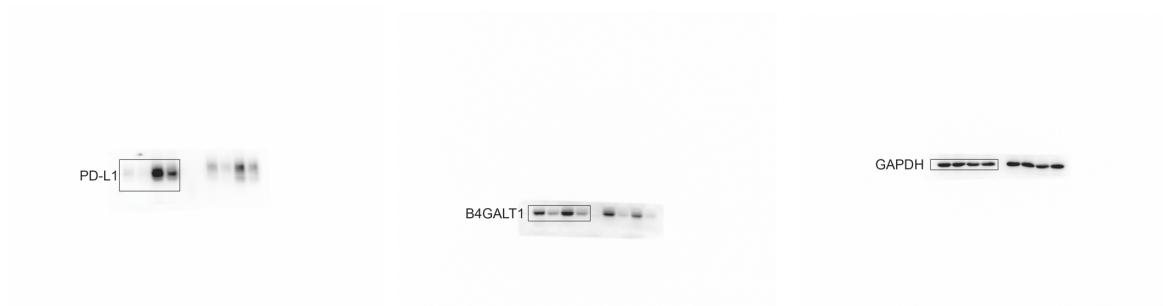

Supplementary Fig.4F  
MDA-MB-231

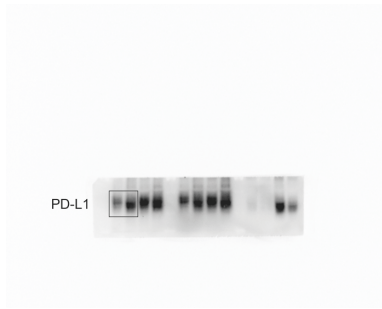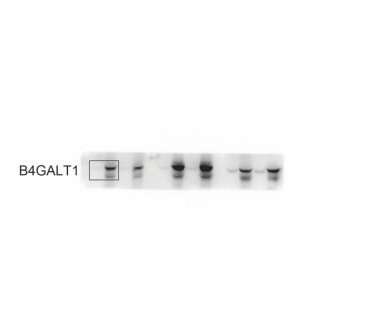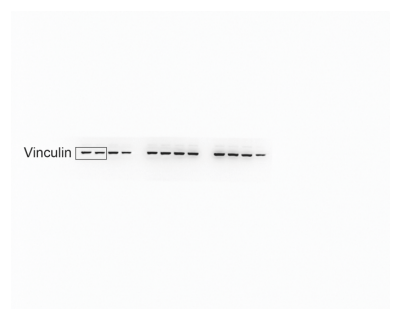

HCC1937

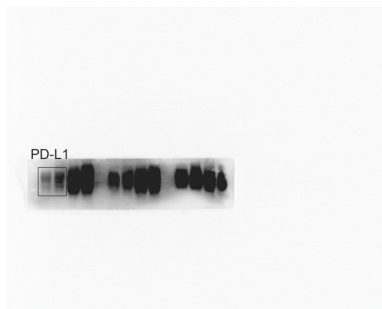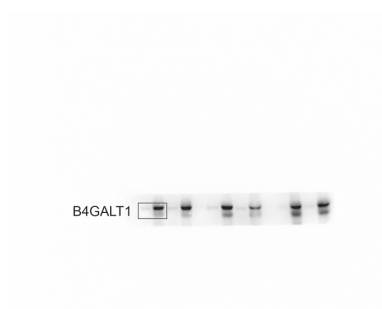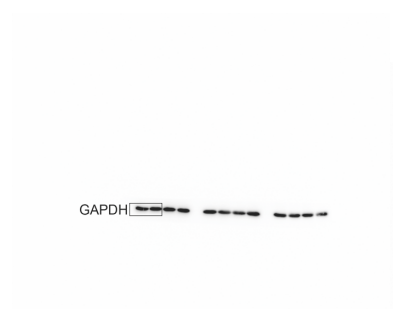

Supplementary Fig.4G  
BT-549

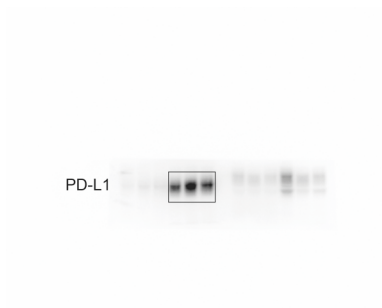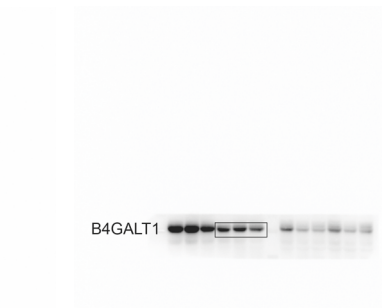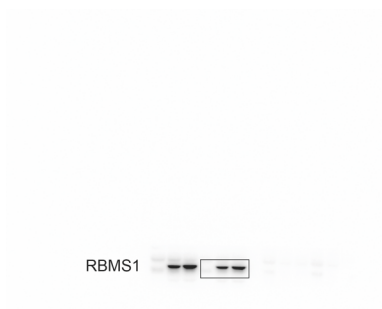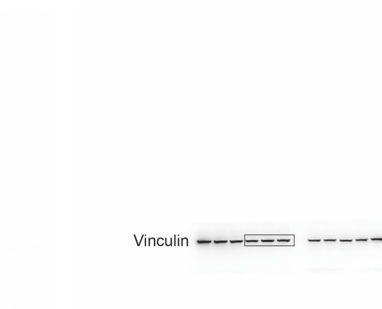



Supplementary Fig.5C  
MDA-MB-231

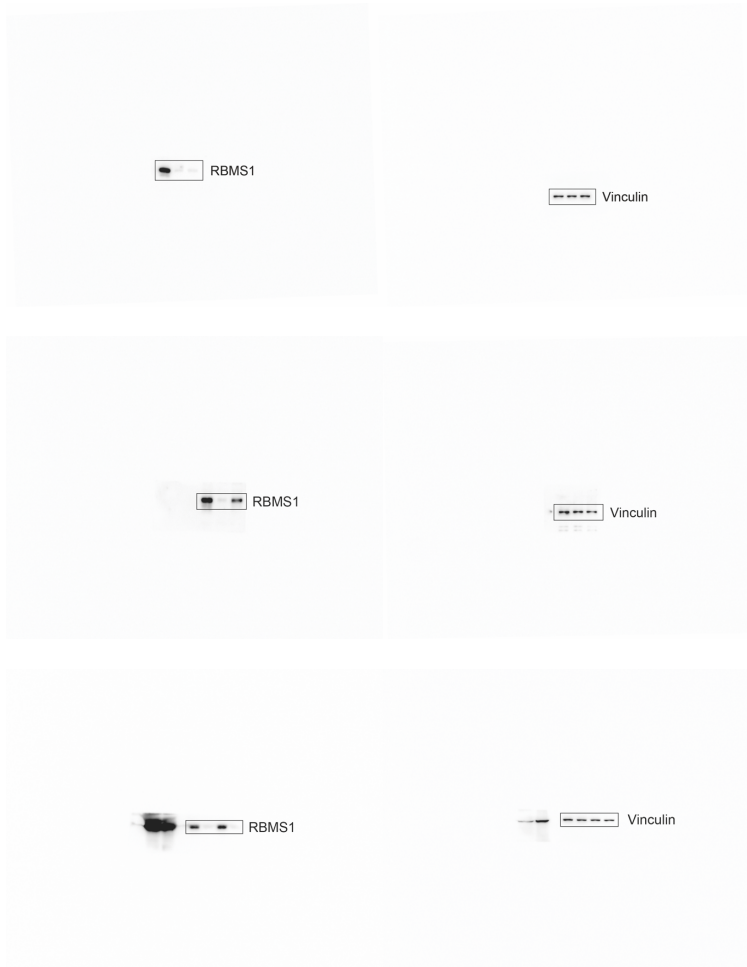

Supplementary Fig.5D  
HEK-293T

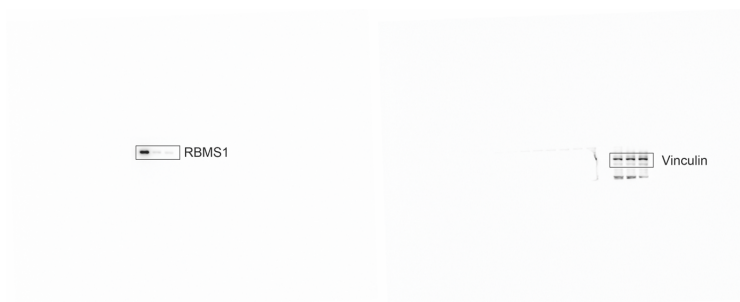

Supplementary Fig.5E(HEK-293T)

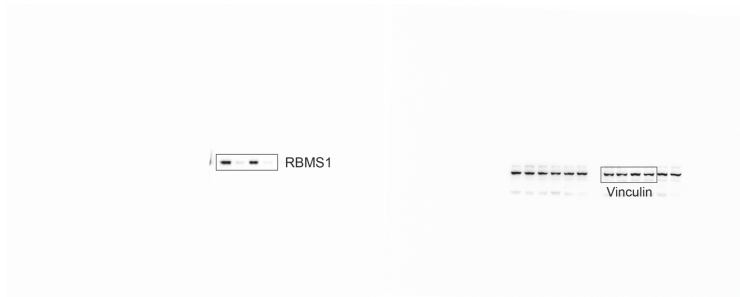

Supplement: 41418_2022_1012_MOESM10_ESM.pdf [file 41418_2022_1012_MOESM10_ESM.pdf]
