# Supplementary material for: Loss of RBMS1 promotes anti-tumor immunity through enabling PD-L1 checkpoint blockade in triple-negative breast cancer
Source: PubMed Central journal article supplement (PMC9613699; doi:10.1038/s41418-022-01012-0), 2022-05-10
Supplement: 41418_2022_1012_MOESM13_ESM.pdf [file 41418_2022_1012_MOESM13_ESM.pdf]

Section 1: Please provide the current title of manuscript

Manuscript ID no.: CDD-21-2791

Title: Loss of RBMS1 promotes anti-tumor immunity through enabling PD-L1 checkpoint blockade in triple-negative breast cancer

Section 2: Please provide the previous authorship, in the order shown on the manuscript before the changes were introduced. Please indicate the corresponding author by adding (CA) behind the name.

|                         | First name(s) | Family name | ORCID or SCOPUS id, if available |
|-------------------------|---------------|-------------|----------------------------------|
| 1 <sup>st</sup> author  | Jinrui        | Zhang       |                                  |
| 2 <sup>nd</sup> author  | Ge            | Zhang       |                                  |
| 3 <sup>rd</sup> author  | Wenjing       | Zhang       |                                  |
| 4 <sup>th</sup> author  | Lu            | Bai         |                                  |
| 5 <sup>th</sup> author  | Luning        | Wang        |                                  |
| 6 <sup>th</sup> author  | Tiantian      | Li          |                                  |
| 7 <sup>th</sup> author  | Li            | Yan         |                                  |
| 8 <sup>th</sup> author  | Chaoqun       | Chen        |                                  |
| 9 <sup>th</sup> author  | Menglin       | Ren         |                                  |
| 10 <sup>th</sup> author | Yuexia        | Jiao        |                                  |

Please use an additional sheet if there are more than 10 authors.

|                         |         |             |                     |
|-------------------------|---------|-------------|---------------------|
| 11 <sup>th</sup> author | Yu      | Sun         |                     |
| 12 <sup>th</sup> author | Lili    | Zhi         |                     |
| 13 <sup>th</sup> author | Yangfan | Qi          |                     |
| 14 <sup>th</sup> author | Jinyao  | Zhao        |                     |
| 15 <sup>th</sup> author | Yang    | Wang ( <A ) | 0000-0001-9385-7393 |

**Section 3:** Please provide a justification for change. Please use this section to explain your reasons for changing the authorship of your manuscript, e.g. what necessitated the change in authorship? Please refer to the (journal) policy pages for more information about authorship. Please explain why omitted authors were not originally included and/or why authors were removed on the submitted manuscript.

In the revision of this manuscript, several students and colleagues helped to perform new required experiments and interpret the newly obtained data. Based on their contributions, they are included as new contributing authors in the revised manuscript.

**Section 4: Proposed new authorship.** Please provide your new authorship list in the order you would like it to appear on the manuscript. Please indicate the corresponding author by adding (CA) behind the name. If the Corresponding Author has changed, please indicate the reason under section 3.

|                         | First name(s) | Family name (this name will appear in full on the final publication and will be searchable in various abstract and indexing databases) | Affiliated institute                          | E-mail address           |
|-------------------------|---------------|----------------------------------------------------------------------------------------------------------------------------------------|-----------------------------------------------|--------------------------|
| 1 <sup>st</sup> author  | Jinrui        | Zhang                                                                                                                                  | Dalian Medical University                     | 1173432719@qq.com        |
| 2 <sup>nd</sup> author  | Ge            | Zhang                                                                                                                                  | Dalian Medical University                     | gezhangunc@163.com       |
| 3 <sup>rd</sup> author  | Wenjing       | Zhang                                                                                                                                  | Dalian Medical University                     | wenjing.1900@aliyun.com  |
| 4 <sup>th</sup> author  | Lu            | Bai                                                                                                                                    | Dalian Medical University                     | ellebai@foxmail.com      |
| 5 <sup>th</sup> author  | Luning        | Wang                                                                                                                                   | Dalian Medical University                     | LNWang0620@163.com       |
| 6 <sup>th</sup> author  | Tiantian      | Li                                                                                                                                     | Dalian Medical University                     | lingyvquan@163.com       |
| 7 <sup>th</sup> author  | Li            | Yan                                                                                                                                    | Dalian Medical University                     | 18379798168@126.com      |
| 8 <sup>th</sup> author  | Yang          | Xu                                                                                                                                     | Southern University of Science and Technology | xuy6@sustech.edu.cn      |
| 9 <sup>th</sup> author  | Dan           | Chen                                                                                                                                   | Dalian Medical University                     | chendan_youxiang@163.com |
| 10 <sup>th</sup> author | Wenting       | Gao                                                                                                                                    | Dalian Medical University                     | gwtpkwy@163.com          |

Please use an additional sheet if there are more than 10 authors.

|                         |           |         |                                                                          |                                                                    |
|-------------------------|-----------|---------|--------------------------------------------------------------------------|--------------------------------------------------------------------|
| 11 <sup>th</sup> author | Chuanzhou | Gao     | Dalian Medical University                                                | <a href="mailto:gaocz-2008@163.com">gaocz-2008@163.com</a>         |
| 12 <sup>th</sup> author | Chaoqun   | Chen    | Dalian Medical University                                                | <a href="mailto:veryqun@icloud.com">veryqun@icloud.com</a>         |
| 13 <sup>th</sup> author | Menglin   | Ren     | Dalian Medical University                                                | <a href="mailto:a824116@163.com">a824116@163.com</a>               |
| 14 <sup>th</sup> author | Yuxia     | Jiao    | Dalian Medical University                                                | <a href="mailto:1926630694@qq.com">1926630694@qq.com</a>           |
| 15 <sup>th</sup> author | Hongqiang | Qin     | Dalian Institute of<br>Chemical Physics, Chinese<br>Academy of Sciences, | <a href="mailto:qinhq@dicp.ac.cn">qinhq@dicp.ac.cn</a>             |
| 16 <sup>th</sup> author | Yu        | Sun     | Dalian Medical University                                                | <a href="mailto:18754809573@163.com">18754809573@163.com</a>       |
| 17 <sup>th</sup> author | Lili      | Zhi     | Dalian Medical University                                                | <a href="mailto:zhi931227@163.com">zhi931227@163.com</a>           |
| 18 <sup>th</sup> author | Yangfan   | Qi      | Dalian Medical University                                                | <a href="mailto:yangfanshy@163.com">yangfanshy@163.com</a>         |
| 19 <sup>th</sup> author | Jinyao    | Zhao    | Dalian Medical University                                                | <a href="mailto:jinyao_z@163.com">jinyao_z@163.com</a>             |
| 20 <sup>th</sup> author | Quentin   | Liu     | Dalian Medical University                                                | <a href="mailto:liuq9@mail.sysu.edu.cn">liuq9@mail.sysu.edu.cn</a> |
| 21 <sup>st</sup> author | Han       | Liu     | Dalian Medical University                                                | <a href="mailto:liuhan@dmu.edu.cn">liuhan@dmu.edu.cn</a>           |
| 22 <sup>nd</sup> author | Yang      | Wang(王) | Dalian Medical University                                                | <a href="mailto:yangwang@dmu.edu.cn">yangwang@dmu.edu.cn</a>       |

Section 5: Author contribution, Acknowledgement and Disclosures. Please use this section to provide a new disclosure statement and, if appropriate, acknowledge any contributors who have been removed as authors and ensure you state what contribution any new authors made (if applicable per the journal or book (series) policy). Please ensure these are updated in your manuscript - after approval of the change(s) - as our production department will not transfer the information in this form to your manuscript.

**New acknowledgements:**

Not applicable

**New Disclosures (financial and non-financial interests, funding):**

The authors have declared that no conflict of interest exists.

**New Author Contributions statement (if applicable per the journal policy):**

Y.W. conceived the project and designed the experiments. J. Z., G. Z., W. Z., L. B., L. W., T. L., L. Y., M. R., Y. J., H. Q., Y. S., L. Z., Y. Q., and J. Z. designed and performed most of the experiments, whereas Y. X., D. C., W. G., C. G., C. C., Q. L., and H. L. performed data analysis. Y. W. provided funds. Y. W. wrote the manuscript.

State 'Not applicable' if there are no new authors.

**Section 6: Declaration of agreement. All authors, unchanged, new and removed must sign this declaration.**

(NB: Please print the form, (docu)-sign and return/upload a scanned copy. Please note that signatures that have been inserted as an image file are acceptable as long as it is handwritten. Typed names in the signature box are unacceptable.) \* Please delete as appropriate. Delete all of the bold if you were on the original authorship list and are remaining as an author.

|                         | First name | Family name |                                                                                                                                                                                    | Signature     | Date       |
|-------------------------|------------|-------------|------------------------------------------------------------------------------------------------------------------------------------------------------------------------------------|---------------|------------|
| 1 <sup>st</sup> author  | Jinrui     | Zhang       | I agree to the proposed new authorship shown in section 4 / <del>and the addition/removal of my name to the authorship list</del> /and the proposed change in corresponding author | Jin Rui Zhang | 02/20/2022 |
| 2 <sup>nd</sup> author  | Ge         | Zhang       | I agree to the proposed new authorship shown in section 4 / <del>and the addition/removal of my name to the authorship list</del> /and the proposed change in corresponding author | Ge Zhang      | 02/20/2022 |
| 3 <sup>rd</sup> author  | Wenjing    | Zhang       | I agree to the proposed new authorship shown in section 4 / <del>and the addition/removal of my name to the authorship list</del> /and the proposed change in corresponding author | Wenjing Zhang | 02/20/2022 |
| 4 <sup>th</sup> authors | Lu         | Bai         | I agree to the proposed new authorship shown in section 4 / <del>and the addition/removal of my name to the authorship list</del> /and the proposed change in corresponding author | Lu Bai        | 02/20/2022 |
| 5 <sup>th</sup> author  | Luning     | Wang        | I agree to the proposed new authorship shown in section 4 / <del>and the addition/removal of my name to the authorship list</del> /and the proposed change in corresponding author | Luning Wang   | 02/20/2022 |
| 6 <sup>th</sup> author  | Tiantian   | Li          | I agree to the proposed new authorship shown in section 4 / <del>and the addition/removal of my name to the authorship list</del> /and the proposed change in corresponding author | Tiantian Li   | 02/20/2022 |
| 7 <sup>th</sup> author  | Li         | Yan         | I agree to the proposed new authorship shown in section 4 / <del>and the addition/removal of my name to the authorship list</del> /and the proposed change in corresponding author | Li Yan        | 02/20/2022 |

|                         | First name | Family name |                                                                                                                                                                                           | Signature   | Date       |
|-------------------------|------------|-------------|-------------------------------------------------------------------------------------------------------------------------------------------------------------------------------------------|-------------|------------|
| 8 <sup>th</sup> author  | Yang       | Xu          | I agree to the proposed new authorship shown in section 4 /and the <b>addition/<del>removal</del>* of my name to the authorship list</b> /and the proposed change in corresponding author | Yang Xu     | 02/20/2022 |
| 9 <sup>th</sup> author  | Dan        | Chen        | I agree to the proposed new authorship shown in section 4 /and the <b>addition/<del>removal</del>* of my name to the authorship list</b> /and the proposed change in corresponding author | Dan Chen    | 02/20/2022 |
| 10 <sup>th</sup> author | Wenting    | Gao         | I agree to the proposed new authorship shown in section 4 /and the <b>addition/<del>removal</del>* of my name to the authorship list</b> /and the proposed change in corresponding author | Wenting Gao | 02/20/2022 |

Please use an additional sheet if there are more than 10 authors.

**In case of author collaborations with formal agreement:**

|                                | Name of consortium/consortia | First name | Family name |                                                                                                                                                                                           | Signature | Date |
|--------------------------------|------------------------------|------------|-------------|-------------------------------------------------------------------------------------------------------------------------------------------------------------------------------------------|-----------|------|
| Representative/legal guarantor |                              |            |             | I agree to the proposed new authorship shown in section 4 /and the <b>addition/<del>removal</del>* of my name to the authorship list</b> /and the proposed change in corresponding author |           |      |

Both added/removed authors should complete the information in the first table under Section 6.

---- End of form ----

|                            |           |      |                                                                                                                                                                                    |               |            |
|----------------------------|-----------|------|------------------------------------------------------------------------------------------------------------------------------------------------------------------------------------|---------------|------------|
| 11 <sup>th</sup><br>author | Chuanzhou | Gao  | I agree to the proposed new authorship shown in section 4 / <del>and the addition/removal*of my name to the authorship list</del> /and the proposed change in corresponding author | Chuanzhou Gao | 02/20/2022 |
| 12 <sup>th</sup><br>author | Chaoqun   | Chen | I agree to the proposed new authorship shown in section 4 / <del>and the addition/removal*of my name to the authorship list</del> /and the proposed change in corresponding author | Chaoqun chen  | 02/20/2022 |
| 13 <sup>th</sup><br>author | Menglin   | Ren  | I agree to the proposed new authorship shown in section 4 / <del>and the addition/removal*of my name to the authorship list</del> /and the proposed change in corresponding author | Menglin Ren   | 02/20/2022 |
| 14 <sup>th</sup><br>author | Yuxia     | Jiao | I agree to the proposed new authorship shown in section 4 / <del>and the addition/removal*of my name to the authorship list</del> /and the proposed change in corresponding author | Yuxia Jiao    | 02/20/2022 |
| 15 <sup>th</sup><br>author | Hongqiang | Qin  | I agree to the proposed new authorship shown in section 4 / <del>and the addition/removal*of my name to the authorship list</del> /and the proposed change in corresponding author | Hongqiang Qin | 02/20/2022 |
| 16 <sup>th</sup><br>author | Yu        | Sun  | I agree to the proposed new authorship shown in section 4 / <del>and the addition/removal*of my name to the authorship list</del> /and the proposed change in corresponding author | Yu Sun        | 02/20/2022 |
| 17 <sup>th</sup><br>author | Lili      | Zhi  | I agree to the proposed new authorship shown in section 4 / <del>and the addition/removal*of my name to the authorship list</del> /and the proposed change in corresponding author | Li Li Zhi     | 02/20/2022 |
| 18 <sup>th</sup><br>author | Yangfan   | Qi   | I agree to the proposed new authorship shown in section 4 / <del>and the addition/removal*of my name to the authorship list</del> /and the proposed change in corresponding author | Yangfan Qi    | 02/20/2022 |
| 19 <sup>th</sup><br>author | Jinyao    | Zhao | I agree to the proposed new authorship shown in section 4 / <del>and the addition/removal*of my name to the authorship list</del> /and the proposed change in corresponding author | Jinyao Zhao   | 02/20/2022 |
| 20 <sup>th</sup><br>author | Quentin   | Liu  | I agree to the proposed new authorship shown in section 4 / <del>and the addition/removal*of my name to the authorship list</del> /and the proposed change in corresponding author | Quentin       | 02/20/2022 |
| 21 <sup>st</sup><br>author | Han       | Liu  | I agree to the proposed new authorship shown in section 4 / <del>and the addition/removal*of my name to the authorship list</del> /and the proposed change in corresponding author | Han Liu       | 02/20/2022 |
| 22 <sup>nd</sup><br>author | Yang      | Wang | I agree to the proposed new authorship shown in section 4 / <del>and the addition/removal*of my name to the authorship list</del> /and the proposed change in corresponding author | Yang Wang     | 02/20/2022 |
